**TITLE:**

**Paternal cigarette smoke alters DNA methylation in sperm and gene expression in offspring brain**

**SHORT TITLE:**

**Paternal smoking, sperm DNA methylation and impacts in offspring**

**AUTHORS:**

**†,\*Patrick J Murphy<sup>1,3</sup>, †Jingtao Guo<sup>2,3</sup>, Timothy G Jenkins<sup>2</sup>, Emma R James<sup>2,6</sup>, John R Hoidal<sup>4</sup>, Thomas Huecksteadt<sup>4</sup>, James M Hotaling<sup>2</sup>, Douglas T Carrell<sup>2,5,6</sup>, \*Bradley R Cairns<sup>3</sup>, \*Kenneth I Aston<sup>2</sup>**

† These authors contributed equally to this work.

\* Corresponding authors: kiaston@utah.edu, patrick\_murphy@urmc.rochester.edu, brad.cairns@hci.utah.edu

1 Departments of Biomedical Genetics, Wilmot Cancer Institute, University of Rochester Medical Center, Rochester NY, USA.

2 Andrology and IVF Laboratories, Department of Surgery, University of Utah School of Medicine, Salt Lake City, Utah, USA

3 Howard Hughes Medical Institute, Department of Oncological Sciences and Huntsman Cancer Institute, University of Utah School of Medicine, Salt Lake City, Utah, USA

4 Department of Internal Medicine, University of Utah School of Medicine and Salt Lake VA Medical Center, Salt Lake City, Utah, USA

5 Department of Obstetrics and Gynecology, University of Utah School of Medicine, Salt Lake City, Utah, USA

6 Department of Genetics, University of Utah School of Medicine, Salt Lake City, Utah, USA

## ABSTRACT:

**Background:** There is growing evidence that paternal pre-conception cigarette smoke (CS) exposure is associated with increased risk of behavioral disorders and cancer in offspring. The aim of the current study was to evaluate the impact of paternal pre-conception CS exposure on sperm DNA methylation and offspring phenotype.

**Methodology/Principal:** To characterize the effects of CS exposure on the sperm epigenome and offspring neurodevelopment, we exposed male mice to CS and bred exposed and control males to unexposed females and subsequently evaluated sperm DNA methylation in sires and frontal cortex DNA methylation and gene expression in offspring. We further investigated the role of oxidative stress on sperm epigenetic changes using a mouse model (*Nrf2*<sup>-/-</sup>) with impaired antioxidant capacity. Lastly, we evaluated the capacity for sperm DNA methylation to recover following removal of CS for 1-5 spermatogenic cycles (28-171 days).

**Conclusions/Significance:** Smoking significantly impacts sperm DNA methylation as well as DNA methylation and gene expression in offspring. These changes were largely recapitulated in *Nrf2*<sup>-/-</sup> mice independent of smoke exposure. Recovery experiments indicated that about half of differentially methylated regions returned to normal within 28 days of removal from smoke exposure, however additional recovery following longer periods was not observed. We present strong evidence that cigarette smoke exposure induces paternally mediated, heritable epigenetic changes. Parallel studies performed in *Nrf2*<sup>-/-</sup> mice provide evidence for oxidative stress as the predominant underlying mechanism for smoke-induced

epigenetic changes to sperm along with the associated effects in offspring. Lastly, recovery experiments indicate that while many epigenetic changes are corrected following removal from smoke exposure, aberrant methylation persists at a significant number of regions even after five spermatogenic cycles

**KEYWORDS:** sperm DNA methylation, epigenetics, gene expression, frontal cortex, smoking, heritable, cigarette, oxidative stress

## **INTRODUCTION:**

Cigarette smoke (CS) exposure is a global epidemic with significant health consequences. In a recent study it was estimated that more than one third of the world's population is regularly exposed, directly or indirectly, to tobacco smoke (1). Further, it was estimated that in 2004 involuntary exposure to tobacco smoke caused 603,000 premature deaths and a loss of 10.9 million disability adjusted life years, and an estimated six million annual deaths are attributable to tobacco smoke exposure (1). Tobacco smoke contains more than 4000 chemicals including a myriad of known carcinogens. The health consequences of smoke exposure are significant and include numerous diseases and dysfunctions of the respiratory tract, increased risk of multiple types of cancer and increased incidence of cardiovascular disease (2, 3). Tobacco smoke exposure is a global problem, the implications of which are becoming increasingly apparent. However, little is known about the impact of paternal exposure to cigarette smoke (CS) on sperm and implications of pre-conception paternal CS on offspring health (4).

83

84 Male fertility rates have steadily declined in developed countries over the past half-  
85 century (5-7), and metabolic disorders have steadily increased over a similar  
86 period (8, 9). These trends are due to a variety of factors, but increased exposure  
87 to environmental toxins is likely a significant contributor. Tobacco smoke exposure,  
88 which negatively affects semen quality (10, 11), might contribute to these trends.  
89 Moreover, *in utero* exposure to maternal tobacco smoke increases the risk of  
90 obesity and hypertension in offspring (12, 13). A more complete understanding of  
91 the effects of preconception paternal tobacco smoke exposure on offspring is of  
92 critical relevance to public health.

93

94 Although understudied, there is evidence for paternally transmitted effects of CS  
95 exposure to offspring. The negative impacts of CS on semen parameters are well  
96 established. Smoking is associated with an accumulation of cadmium and lead in  
97 seminal plasma, reduced sperm count and motility, and increased morphological  
98 abnormalities in sperm (10, 11). In addition, reduced reproductive potential has  
99 been reported in tobacco smoke-exposed mice (14) and humans (15). Although  
100 the impact of tobacco smoke exposure on germ cell genetics and epigenetics has  
101 received surprisingly little attention, recent evidence demonstrates strong effects  
102 on the adult male germline. Adult male mice exposed to sidestream tobacco smoke  
103 display significant increases in sperm DNA mutations at expanded simple tandem  
104 repeats (ESTRs) (16), as well as more frequent aberrations in sperm chromatin  
105 structure and elevated sperm DNA damage (14). In contrast, CS-exposed male

mice exhibit no measurable increase in somatic cell chromosome damage, indicating that germ cells may be more prone to environmentally-induced genetic and/or epigenetic insults compared with somatic cells. Destabilization of ESTRs in the adult male germline is well documented to be associated with transgenerational effects in the mouse genome (17-21).

The International Association for Research on Cancer recently declared that *paternal* smoking *prior* to pregnancy is associated with a significantly elevated risk of leukemia in the offspring (22), suggesting CS-induced genetic or epigenetic changes occur in sperm that are transmitted to offspring. We recently reported altered sperm DNA methylation (DNAm) patterns in men who smoke (23). In addition, smoking has been clearly shown to modify DNAm patterns and gene expression in somatic tissues in individuals exposed to first- or second-hand tobacco smoke (24-26) as well as in newborns of smoking mothers (27-29). A growing body of evidence suggests that CS exposure could have negative health consequences not only for the exposed fathers, but also for their offspring.

Results of these studies motivated us to investigate the impact of smoking on mouse sperm DNAm as well as the potential transmission of those effects to offspring. Additionally, we aimed to explore the dynamics of sperm epigenetic changes after withdrawal from smoke, to determine whether DNAm changes recover following removal of the insult for more than five complete cycles of spermatogenesis (171 days; Figure 1).

Lastly, to investigate the mechanism underlying CS-induced alterations to the sperm epigenetic profile, we used a knockout mouse model to assess the role of antioxidant capacity on smoke-induced alterations to the methylome. The nuclear factor (erythroid-derived 2)-like 2 (NRF2) pathway is the primary cellular defense against the cytotoxic effects of oxidative stress. Thus, to investigate the mode by which CS induced epigenetic changes might occur, we utilized the *Nrf2*<sup>-/-</sup> mouse model, which has compromised antioxidant capacity.

## RESULTS:

### Experimental Design and phenotypic effects:

Male mice were assigned to CS- exposed or non-exposed groups (n = 10-12 per group). The CS animals were exposed to the body mass-adjusted equivalent of 10-20 cigarettes per day, 5 days per week over a period of 60 days. CS- exposed and control mice were bred to unexposed females, and offspring were analyzed for phenotypic and molecular measures.

In agreement with the literature, both WT and *Nrf2*<sup>-/-</sup> mice that were exposed to CS weighed significantly less than non-exposed control animals (TABLE 1). Sperm concentration and motility were not significantly impacted by CS exposure, sperm concentration was lower in *Nrf2*<sup>-/-</sup> than WT males, and conception was significantly delayed in CS-exposed *Nrf2*<sup>-/-</sup> mice compared with unexposed *Nrf2*<sup>-/-</sup> mice (TABLE 1). Neither growth trajectories nor sperm

parameters were different in F1 animals based on paternal CS exposure (TABLE 2).

**Smoking-induced DNAm changes in F0 sperm were either maintained, recovered, or variable, depending on the locus.**

Initially, we performed reduced representation bisulfite sequencing (RRBS) to explore the effects of smoking on F0 sperm DNAm patterns (sperm collected within 3 days of completing a 60-day smoking treatment), and we examined whether CS-induced methylation changes recover to baseline unexposed levels following removal of CS exposure (28, 103 and 171 days after smoking treatment; n = 10 per group).

At individual CpG sites, we found changes in DNA methylation at a large number of CpGs (Figure 2A & Figure S1A) with essentially equal representation of sites that lost methylation and gained methylation as a consequence of smoke exposure. In addition, we found that the number of differentially methylated CpGs declined only slightly after removal of CS exposure for 28-171 days (Figure 2A).

We partitioned differentially methylated CpGs into three groups: 1) shared, meaning differentially methylated CpGs that were maintained between the treatment group and the respective recovery group, 2) recovered, meaning CpGs that were differentially methylated after initial exposure but were no longer differentially methylated in the recovery group, and 3) new, meaning CpGs that

were not differentially methylated after initial exposure but emerged as newly differentially methylated in the recovery groups. These classes were assessed separately for CpGs that initially lost methylation verses those that initially gained methylation relative to the control. Interestingly, for CpGs that lost methylation, the three groups were relatively evenly represented across recovery times, with only a slight over-representation of shared CpGs. For CpGs that gained methylation, there was a slight bias toward the emergence of new differentially methylated CpGs across recovery groups (Figure 2B).

Given that DNAm status of CpG regions likely has a greater capacity to confer functional effects compared with individual sites, we subsequently binned individual CpG sites into regions based on their proximity (see methods). We then performed analyses similar to those performed for individual CpGs. Interestingly, changes in DNA methylation occurred at far fewer regions compared with individual CpGs (Figure S1B), and we found strong evidence for recovery of smoke-induced sperm DNAm changes following a recovery period. Strikingly, the majority of DNAm regions that recovered returned to control levels within 28 days of removal of smoke exposure, with no evidence for additional correction following longer recovery periods (Figure 2C). In contrast with the individual CpG data, we found that far fewer new differentially methylated regions (DMRs) emerged during the recovery period (Figure 2D).



## **Regions of high and low DNAm recovered, and changes were associated with Nrf2-mediated effects.**

We then sought to understand epigenetic properties that might impact the ability of specific regions to recover following removal of the CS, including the initial methylation status. For this analysis, we classified all DMRs into six classes, based on their dynamics during recovery (shared, recovered or new) and their direction of change (increase or decrease; Figure 3A). We discovered that the initially hypomethylated DMRs in which methylation increased with smoke exposure displayed a higher likelihood of recovery, and initially hypermethylated DMRs that decreased in methylation were likewise more likely to recover (Figure 3A). Regions of intermediate DNAm were less likely to recover across all groups. In addition, we observed that recovered DMRs that initially decreased in methylation level show lower variation compared to all other groups (Figure S2A), thus suggesting that regions of extreme hyper- and hypo-DNAm were less likely to change after CS exposure, and when changes did occur, these regions were more likely to recover.

We hypothesized that CS- induced alterations to the methylome might depend on antioxidant capacity, and that reducing antioxidant capacity might mimic or enhance smoke-induced changes to sperm DNAm. This led us to examine the changes of sperm DNAm in *Nrf2*<sup>-/-</sup> mice (compared to WT mice), as well as the changes in sperm DNAm in CS-exposed compared with unexposed *Nrf2*<sup>-/-</sup> mice. We initially found that the degree of DNA methylation changes, and the number

of sites impacted, were similar in *Nrf2*<sup>-/-</sup> mice compared with WT (Figure S3A). We were surprised to find that the CS-induced DNAm changes in WT sperm were largely recapitulated in *Nrf2*<sup>-/-</sup> sperm irrespective of CS exposure (Figure 3B). Notably, the sperm DNAm changes observed in unexposed *Nrf2*<sup>-/-</sup> mice were similar to changes observed in *Nrf2*<sup>-/-</sup> mice that were exposed to CS, with no evidence for an enhanced effect attributable to CS. This correlation in the degree of DNAm change was consistent when assessed genome-wide, and we did not observe this correlation when comparing our data to other datasets evaluating the effect of other environmental factors (vinclozolin exposure and protein restricted diet) (30, 31) on sperm DNAm (Figure 3C).

### **Smoking-induced DNAm changes in F1 brains were regulated by oxidative stress**

CS-induced epigenetic changes in sperm might correspond with an affect in offspring if they are maintained through fertilization, or if those DNAm changes are associated with an alternative, unidentified inheritance mechanism. Thus, we aimed to test whether paternal CS exposure could impact the next generation (F1). Given that brain and nervous systems were previously reported to be sensitive to preconception paternal exposures (32-35), we investigated DNAm by RRBS in the prefrontal cortex of F1 mice derived from CS-exposed WT and *Nrf2*<sup>-/-</sup> sires compared to the offspring of unexposed males (n = 8 per group). Similar to observations in F0 sperm, we found that paternal smoking altered DNAm patterns in offspring brains, and these DNAm changes were highly

similar to brain DNAm changes observed in offspring of both unexposed *Nrf2*<sup>-/-</sup> males ( $r=0.609$ ) (Figure 4A) and CS-exposed *Nrf2*<sup>-/-</sup> males ( $r=0.477$ ). In agreement with F0 sperm DNAm data, exposure to CS appeared to have no additional impact on brain DNAm beyond the *Nrf2*<sup>-/-</sup> effect (Figure 4A - right). These observations suggest that CS-induced DNAm changes that occur in F1 brains are mediated by paternal oxidative stress, a well-established effect of NRF2 depletion (36, 37).

To investigate whether F0 CS-induced effects can be passed to F2, we compared the smoke-associated DNAm changes observed in F0 WT sperm with that of F1 sperm and found no correlation ( $r=-0.001$ ; Figure 4B). We also observed that paternal CS-induced DMRs in F1 brains and those in smoke-exposed F0 sperm had minimal overlap (hypergeometric  $p$ -value =1; Figure 4C), indicating a lack of maintained DNAm changes from sperm through fertilization, into brain development. Accordingly, regions where DNA methylation changes occurred are not marked by chromatin features that are known to be maintained in mature sperm (38)(FIGURE S4). Regardless of whether changes in DNAm are a marker of epigenetic inheritance, or a driver of epigenetic inheritance, these results suggest that the effects of CS exposure do not persist through several generations.

**Smoking causes high gene expression variations in F1 brains**

To further investigate the potential for phenotypic effects in offspring associated with paternal CS exposure, we performed RNA-seq of the F1 frontal cortex in the same animals as those assessed for frontal cortex DNAm. Interestingly, paternal CS exposure caused a globally elevated variation in gene expression in the F1 brains, which was also observed in the *Nrf2*<sup>-/-</sup> offspring (Figure 5A). In agreement with the F1 brain DNAm data, we found that the paternal CS-induced gene expression changes in WT were highly similar to the *Nrf2*<sup>-/-</sup> offspring, and the effects were not further elevated in the offspring of smoked *Nrf2*<sup>-/-</sup> mice (Figure 5B & S4D-E). Notably, this increased variation limited our ability to identify reliably differentially expressed genes. Instead, we ranked genes by changes in gene expression and performed gene ontology (GO) analysis. We found that gene transcripts associated with classes including neuropeptide receptors and hormone activity were over-represented in the offspring of CS-exposed males (Figure 5C), while gene transcripts associated with gene classes including immune response and metabolism were under-represented (Figure 5D).

## DISCUSSION:

Recent studies have demonstrated that paternal preconception exposures to a variety of pharmacologic agents and pollutants, including nicotine, THC, morphine, and benzo[a]pyrene effect offspring phenotype, and often confer neurobehavioral consequences (32-35, 39-42). In some cases, the impacts are inherited transgenerationally (40, 41). The direct assessment of

transgenerational inheritance through F2 was beyond the scope of the current study, however the absence of correlation between DMRs in F1 sperm and F2 sperm suggests that the effects we observed in F1 frontal cortex are not likely to be maintained in a second generation, although an alternate non-DNA-methylation associated mechanism for transgenerational inheritance mediated through noncoding RNAs or chromatin structure cannot be ruled out. Our data suggest that in our experimental model, oxidative stress is the major contributor to sperm DNA methylation changes and subsequent effects in the offspring. This does not exclude the possibility that other factors, such as low-level nicotine exposure might also contribute to DNAm effects (32, 33, 39, 42), but we suspect these additional factors are only minor contributors, based on the absence of transgenerational effects in our system.

CS exposure clearly impacts sperm DNAm patterns, however it is reassuring that many of the DNAm effects that occurred at high CpG dense regions were corrected within 28 days. Genomic regulatory regions (such as promoters and enhancers) tend to have high CpG density in the mouse. Thus, DNA methylation changes at these regions, which might otherwise impact gene regulation, are likely to be relatively short-lived. These data are in agreement with previous studies that found that CS exposure significantly impacts DNA methylation patterns in whole blood, and CS-associated methylation changes are largely corrected following smoking cessation in a time-dependent manner (43, 44).

We observed recovery after just twenty-eight days, which corresponds to just under the duration of a full spermatogenic cycle in mice of 30 days. In man, a spermatogenic cycle is 67 days, and additional research is required to characterize the similarities and differences in the dynamics of sperm DNAm alterations between mice and men. Additionally, it is not yet known whether the corrections observed following removal of CS exposure ameliorate the affects observed in offspring, or whether those effects are driven by the minority of regions that persist following CS removal. Addressing these unknowns will be of great interest for follow-up studies.

Interestingly, we found that regions of extreme hyper- and hypo-DNAm were less likely to be impacted by CS exposure, and when changes did occur, these regions were more likely to recover. This is consistent with a recent monozygotic twin study that investigated differences in blood DNAm in twins discordant for smoking (45). Additionally, our observation that individual CpGs did not recover after smoke exposure to near the same degree as more CpG dense regions suggests that CpG density might provide a degree of “buffering” against environmental insults. If genomic regulatory function were held by individual CpGs rather than by clusters of CpGs, minor variations or fluctuation in DNAm levels might have significant impacts on physiology. Instead, our data suggests that regions of higher CpG density, which are often found at gene regulator regions like promoters (46), vary less in DNAm level than individual CpGs, and therefore, these regions may be able to withstand a higher degree of

environmental insult without having lasting effects on physiology. This robustness in function might explain in part why genomic regulatory regions have a high degree of CpG density.

We investigated the impact of CS exposure in the oxidative stress-compromised *Nrf2*<sup>-/-</sup> mouse strain with the expectation that we would observe more profound effects of CS exposure on sperm epigenetic changes. Remarkably, while we did not observe evidence for elevated susceptibility to CS-induced sperm DNAm changes in *Nrf2*<sup>-/-</sup>, we found the CS-effects observed in WT animals were commensurately recapitulated in *Nrf2*<sup>-/-</sup> mice independent of CS exposure, suggesting that elevated oxidative stress is the primary mechanism for CS-mediated sperm epigenetic changes. These findings were remarkably consistent with the observations of offspring frontal cortex DNAm and gene expression changes as well. While CS-exposure may represent among the most extreme examples of environmental insults that induce oxidative stress, the list of environmentally relevant exposures that impact oxidative stress are innumerable, and the results presented here indicate that all such exposures could potentially impact the epigenetic status of the paternal germline and thus offspring phenotype. In addition, our work provides strong evidence that *Nrf2*<sup>-/-</sup> mice can serve as a good animal model to study CS-exposure induced effects. Further studies may focus on investigating the molecular mechanisms underlying NRF-mediated DNAm alterations.

Lastly, by comparing the DNAm and gene expression patterns in the frontal cortex between offspring of male mice exposed to CS with those not exposed, we found strong evidence for an impact of paternal smoking on offspring phenotype. In keeping with data obtained from *Nrf2*<sup>-/-</sup> mice, we suggest that oxidative stress agents might contribute to behavioral or developmental impacts in offspring. Notably however, our data showed little overlap of DNAm changes in the F1 frontal cortex with DNAm changes in the F0 sperm. While this was somewhat expected, as DNAm state undergoes dramatic reprogramming during early development and neuronal differentiation, it is important to highlight — direct mitotic inheritance of DNAm state is unlikely to mechanistically contribute to the oxidative stress effects we observed in F1 mice. Furthermore, we propose that DNAm may be more accurately described as a marker of epigenetic inheritance and not a mechanistic driver in transmitting environmental impacts between generations. Additional studies are necessary to confirm this and to distinguish other epigenetic features as markers or drivers, including chromatin status and small RNAs, which could play a significant role in inheritance. Further, the observation that CS-associated sperm DNAm changes were not identified in the sperm of the F1 generation offers reassuring evidence that the changes observed in F1 animals likely would not persist in the F2 generation. However, direct studies to evaluate the potential for transgenerational impacts of CS exposure are warranted. The implications of this for human spermatogenesis and transgenerational inheritance also warrant further investigation.



Here we present strong evidence for: 1) a significant impact of CS-exposure on the male germline, 2) relatively rapid partial correction of CS-induced sperm DNAm alterations following removal of CS exposure, 3) the implication of oxidative stress as the primary mechanism for CS-induced sperm DNAm changes and 4) an impact of paternal CS exposure on offspring phenotype based on frontal cortex DNAm and gene expression patterns. These data have important implications in characterizing the potential mechanisms that underlie the elevated risk observed for paternal CS exposure to offspring health. In addition, the findings reported here are likely more broadly applicable to understanding the risks of other environmental exposures that induce oxidative stress such as air pollution and some chemical exposures.

While additional studies are necessary to fully characterize the impacts of CS exposure on offspring phenotype, the mechanisms involved in heritability of pre-conception paternal exposures, and the phenotypic impacts of the observed epigenetic and gene expression changes in offspring, the current study significantly expands our understanding of the impacts of paternal CS exposure on offspring and the underlying mechanism of CS induced epigenetic changes to sperm.

## **MATERIALS AND METHODS:**

### **Animals:**

#### **Animal care:**

All animal experiments were performed under protocols that were approved by the University of Utah Institutional Animal Care and Use Committee (protocol # 14-11006). All animals were obtained from Jackson Laboratories (Bar Harbor, ME, USA)

#### **Smoke exposure:**

All CS-exposed and control mice were age matched and smoking was initiated between 6 and 7 weeks of age. Mice were exposed to CS using a Teague Model TE-10 (Teague Enterprises, Woodland, CA) smoking machine, which produces a combination of side-stream and mainstream CS. A pump on the machine “puffs” each 3R4F University of Kentucky research cigarette for 2 seconds for a total of 9 puffs before ejection. The 2.5 hour daily exposure occurred for 5 consecutive days per week over a period of 60 days. The smoking chamber atmosphere was periodically sampled to confirm total particulate matter concentrations of approximately 150 mg/m<sup>3</sup>, the human equivalent of smoking approximately 10-20 cigarettes per day (47).

#### **Smoking and recovery experiments:**

To characterize the impact of smoke exposure on the sperm DNA methylome, and the capacity for smoke-induced sperm DNA methylation alterations to recover following removal of the insult, we exposed 40 C57BL/6J (Jackson Labs Stock # 000664) to cigarette smoke for comparison against 10 age-matched, non-smoked controls. Ten CS-exposed mice and the 10 non-exposed controls

were euthanized and tissues collected within three days of the CS exposure period. Subsequent “recovery” groups of 10 CS-exposed animals were euthanized 28, 103 and 171 days after the exposure period (corresponding to approximately 0.8, 3 and 5 spermatogenic cycles). In addition to experiments with wild-type animals, ten age-matched *Nrf2*<sup>-/-</sup> mice on a C57BL/6J genetic background (Jackson Labs Stock # 017009) were exposed to the same doses of CS for the same time period, and ten age-matched unexposed *Nrf2*<sup>-/-</sup> mice were utilized as controls.

#### **Offspring transmission experiments:**

Founder mice for heritability experiments included wild type C57BL/6J mice (Jackson Labs Stock # 000664) that were exposed and not exposed to CS (n = 10-12 per group). Approximately one week after the exposure period, exposed and control males were introduced to 6-week old CAST/EiJ female mice (Jackson Labs Stock # 000928), and pairs were kept together until F1 litters were born, or for 7 weeks without conceiving, whichever came first. The motivation for outcrossing males to CAST/EiJ females was to leverage polymorphic alleles to enable attributing reads to a specific parent, however due to the large average spacing of informative SNPs in the CAST strain and the short sequencing reads inherent in Illumina sequencing we were unable to classify the large majority of reads based on parent-of-origin. We therefore analyzed the data without regard to parent-of-origin. F1 litters were weaned at approximately 21 days of age, and pups were regularly weighed until they were euthanized. F1 animals were

euthanized at 14-17 weeks of age, and heart, lung, liver, kidney, brain, testis and epididymal sperm were collected for molecular studies.

### **Animal phenotyping:**

Following epididymal sperm extraction, sperm count and motility were assessed in CS-exposed and control F0 animals as well as F1 offspring. In addition, time to conception and litter size were compared between F0 groups. F1 offspring were evaluated for growth trajectory. For statistical analysis of growth trajectories between groups, animal weights were plotted against age for all pups within a group (C57BL/6J or *Nrf2*<sup>-/-</sup>). Models to fit the data were tested, and a logarithmic model generally yielded the highest  $r^2$ . Theoretical weights were calculated for each weight event based on the model generated, and differences between theoretical and actual weight were calculated. A mean of average differences within an individual across weight events was calculated for each animal, and unpaired student's t-test was used to compare these differences between smoked and non-smoked animals within each group. Differences in animal weights and sperm parameters were evaluated using two-tailed Student's t-test, and two-tailed Fisher's Exact tests were used to evaluate weekly differences in conception between groups.  $P < 0.05$  was considered significant.

### **Molecular analyses:**

#### **Sperm collection and DNA extraction:**

Sperm was collected from the cauda epididymis and vas deferens immediately after euthanasia by scoring the tissue along the length of the tubules with a 28-G needle and gently pressing the tissue to expel the sperm mass. Tissues were then placed in a center-well dish in equilibrated Quinn's medium supplemented with FBS in a humidified CO<sub>2</sub> incubator for one hour. Following the swim out period, sperm concentration and motility were assessed on a Makler chamber and sperm were snap frozen in liquid nitrogen. Samples were subsequently thawed and subjected to a stringent somatic cell lysis protocol to ensure a pure population of sperm. Briefly, samples were passed through a 40 µm filter to remove cell and tissue clumps followed by two 14 ml washes with ddH<sub>2</sub>O and incubation for at least 60 minutes in somatic cell lysis buffer (0.1% SDS, 0.5% Triton X in ddH<sub>2</sub>O) at 4° C. Following somatic cell lysis and visual confirmation of the absence of contaminating cells, sperm DNA was extracted using the Qiagen AllPrep Universal kit. Samples in cell lysis buffer were passed through a 28-gauge syringe multiple times to disrupt sperm membranes and liberate nucleic acids prior to extraction.

#### **Frontal cortex dissection and nucleic acid extraction:**

Following euthanasia of F1 males (n = 8 per group), left brain hemispheres were dissected and placed in PaxGene tissue stabilizer and after 24 hours, fixed in PaxGene fixative and stored at -80° C. Samples were subsequently thawed and frontal cortex dissected under a stereo microscope according to the method described by Chiu et al. (48). Tissue was then disrupted using a microcentrifuge

pestle, and RNA and DNA were extracted using the Qiagen AllPrep Universal kit according to manufacturer's protocols.

#### **RRBS library construction:**

Following DNA extraction, Bioo Scientific NEXTflex Bisulfite Library Prep Kit for Illumina Sequencing was used for library preparation. To maximize coverage, we employed two separate restriction digests with MspI and TaqI. Following digestion, products were pooled, and Klenow Fragment was utilized to create 3'A overhangs. DNA was subsequently purified with Zymo DNA Clean and Concentrate Columns followed by ligation of Methylated Illumina PE Adapters and Ampure purification with SPRI beads. Purified products were Sodium Bisulfite Converted using ZymoResearch EZ DNA Methylation Gold Kit, and libraries were amplified over 20 cycles using Platinum Taq DNA polymerase, followed by a final Ampure purification and confirmation of library size range on a 2% agarose gel. DNA was submitted to the Huntsman Cancer Institute High Throughput genomic core for sequencing on a Hi-Seq 2500 using 50 cycle-single read chemistry. Four to six samples were sequenced per lane for a minimum of 35-million reads per sample.

#### **RNAseq library construction:**

RNA extracted from F1 frontal cortices (n = 8 per group) was subjected to Illumina TruSeq Stranded RNA kit with Ribo-Zero Gold library preparation and subsequently sequenced on a Hi-Seq 2500 using 50 Cycle-Single Read

Sequencing v4. Eight samples were sequenced per lane for a minimum of 25-  
million reads per sample.

# **Bioinformatics analyses:**

For genome wide DNA methylation analysis, sequence data from RRBS libraries  
was aligned to the mouse mm10 genome using the Bismark pipeline with special  
attention to RRBS specific issues, as noted in the Bismark User Guide and the  
Bismark RRBS Guide. Only CpGs where read coverage was greater than 8 for at  
least 4 biological replicates were considered “scoreable” for downstream  
analysis. Only CpGs with more than 5% change in methylation relative to control  
samples were classified as differentially methylated. When considering DMRs,  
only regions greater than 50 base-pairs in length with 3 or more scorable CpGs  
were analyzed. Then, one third of the CpGs within each analyzed region needed  
to be differentially methylated in order for a given region to be under  
consideration as a DMR. Finally, qualifying regions were classified as bonafide  
DMRs if there was more than 5% change in methylation relative to control  
samples. For genome wide gene expression analysis, sequencing data from  
RNASeq libraries was aligned using Novoalign. Aligned splice junction were  
converted to genomic coordinates and low quality and non-unique reads were  
further parsed using SamTranscriptomeParser (USeq; v8.8.8) under default  
settings. Stranded differential expression analysis was calculated with the USeq  
program DefinedRegionDifferentialSeq, which utilizes DESeq2 and the reference  
mm10. Normalized read count tables were then analyzed in R, along with all

DNA methylation data. Integration and parsing of bed files or tables was performed in R. Generation of all figures and statistical analyses was accomplished using standard methods in R, with the exception of aggregate histone modification profiles, which were generated using Deeptools. Gene ontology analysis was performed using DAVID Functional Annotation Bioinformatics Resources.

## REFERENCES

1. Oberg M, Jaakkola MS, Woodward A, Peruga A, Pruss-Ustun A. Worldwide burden of disease from exposure to second-hand smoke: a retrospective analysis of data from 192 countries. *Lancet*. 2011;377(9760):139-46.
2. DiFranza JR, Aligne CA, Weitzman M. Prenatal and postnatal environmental tobacco smoke exposure and children's health. *Pediatrics*. 2004;113(4 Suppl):1007-15.
3. Moritsugu KP. The 2006 Report of the Surgeon General: the health consequences of involuntary exposure to tobacco smoke. *Am J Prev Med*. 2007;32(6):542-3.
4. Laubenthal J, Zlobinskaya O, Poterlowicz K, Baumgartner A, Gdula MR, Fthenou E, et al. Cigarette smoke-induced transgenerational alterations in genome stability in cord blood of human F1 offspring. *FASEB journal : official publication of the Federation of American Societies for Experimental Biology*. 2012;26(10):3946-56.
5. Rolland M, Le Moal J, Wagner V, Royere D, De Mouzon J. Decline in semen concentration and morphology in a sample of 26 609 men close to general population between 1989 and 2005 in France. *Human reproduction*. 2012.
6. Priskorn L, Holmboe SA, Jacobsen R, Jensen TK, Lassen TH, Skakkebaek NE. Increasing trends in childlessness in recent birth cohorts - a registry-based study of the total Danish male population born from 1945 to 1980. *International journal of andrology*. 2012;35(3):449-55.
7. Swan SH, Elkin EP, Fenster L. Have sperm densities declined? A reanalysis of global trend data. *Environmental health perspectives*. 1997;105(11):1228-32.
8. Ford ES, Giles WH, Mokdad AH. Increasing prevalence of the metabolic syndrome among u.s. Adults. *Diabetes Care*. 2004;27(10):2444-9.
9. Ford ES, Giles WH, Dietz WH. Prevalence of the metabolic syndrome among US adults: findings from the third National Health and Nutrition Examination Survey. *JAMA : the journal of the American Medical Association*. 2002;287(3):356-9.
10. Kiziler AR, Aydemir B, Onaran I, Alici B, Ozkara H, Gulyasar T, et al. High levels of cadmium and lead in seminal fluid and blood of smoking men are



associated with high oxidative stress and damage in infertile subjects. *Biological trace element research*. 2007;120(1-3):82-91.

11. Kulikauskas V, Blaustein D, Ablin RJ. Cigarette smoking and its possible effects on sperm. *Fertility and sterility*. 1985;44(4):526-8.
12. Cupul-Uicab LA, Skjaerven R, Haug K, Melve KK, Engel SM, Longnecker MP. In utero exposure to maternal tobacco smoke and subsequent obesity, hypertension, and gestational diabetes among women in the MoBa cohort. *Environmental health perspectives*. 2012;120(3):355-60.
13. Behl M, Rao D, Aagaard K, Davidson TL, Levin ED, Slotkin TA, et al. Evaluation of the Association between Maternal Smoking, Childhood Obesity, and Metabolic Disorders: A National Toxicology Program Workshop Review. *Environmental health perspectives*. 2012.
14. Polyzos A, Schmid TE, Pina-Guzman B, Quintanilla-Vega B, Marchetti F. Differential sensitivity of male germ cells to mainstream and sidestream tobacco smoke in the mouse. *Toxicology and applied pharmacology*. 2009;237(3):298-305.
15. Fuentes A, Munoz A, Barnhart K, Arguello B, Diaz M, Pommer R. Recent cigarette smoking and assisted reproductive technologies outcome. *Fertility and sterility*. 2010;93(1):89-95.
16. Marchetti F, Rowan-Carroll A, Williams A, Polyzos A, Berndt-Weis ML, Yauk CL. Sidestream tobacco smoke is a male germ cell mutagen. *Proceedings of the National Academy of Sciences of the United States of America*. 2011;108(31):12811-4.
17. Glen CD, Dubrova YE. Exposure to anticancer drugs can result in transgenerational genomic instability in mice. *Proceedings of the National Academy of Sciences of the United States of America*. 2012;109(8):2984-8.
18. Dubrova YE, Hickenbotham P, Glen CD, Monger K, Wong HP, Barber RC. Paternal exposure to ethylnitrosourea results in transgenerational genomic instability in mice. *Environmental and molecular mutagenesis*. 2008;49(4):308-11.
19. Barber RC, Dubrova YE. The offspring of irradiated parents, are they stable? *Mutation research*. 2006;598(1-2):50-60.
20. Dubrova YE. Radiation-induced transgenerational instability. *Oncogene*. 2003;22(45):7087-93.
21. Barber R, Plumb MA, Boulton E, Roux I, Dubrova YE. Elevated mutation rates in the germ line of first- and second-generation offspring of irradiated male mice. *Proceedings of the National Academy of Sciences of the United States of America*. 2002;99(10):6877-82.
22. Secretan B, Straif K, Baan R, Grosse Y, El Ghissassi F, Bouvard V, et al. A review of human carcinogens--Part E: tobacco, areca nut, alcohol, coal smoke, and salted fish. *Lancet Oncol*. 2009;10(11):1033-4.
23. Jenkins TG, James ER, Alonso DF, Hoidal JR, Murphy PJ, Hotaling JM, et al. Cigarette smoking significantly alters sperm DNA methylation patterns. *Andrology*. 2017.
24. Kohli A, Garcia MA, Miller RL, Maher C, Humblet O, Hammond SK, et al. Secondhand smoke in combination with ambient air pollution exposure is associated with increased CpG methylation and decreased expression of IFN-

gamma in T effector cells and Foxp3 in T regulatory cells in children. Clin Epigenetics. 2012;4(1):17.

25. Bosse Y, Postma DS, Sin DD, Lamontagne M, Couture C, Gaudreault N, et al. Molecular signature of smoking in human lung tissues. Cancer research. 2012;72(15):3753-63.

26. Word B, Lyn-Cook LE, Jr., Mwamba B, Wang H, Lyn-Cook B, Hammons G. Cigarette Smoke Condensate Induces Differential Expression and Promoter Methylation Profiles of Critical Genes Involved in Lung Cancer in NL-20 Lung Cells In Vitro: Short-Term and Chronic Exposure. International journal of toxicology. 2012.

27. Breton CV, Byun HM, Wenten M, Pan F, Yang A, Gilliland FD. Prenatal tobacco smoke exposure affects global and gene-specific DNA methylation. Am J Respir Crit Care Med. 2009;180(5):462-7.

28. Perera F, Herbstman J. Prenatal environmental exposures, epigenetics, and disease. Reproductive toxicology. 2011;31(3):363-73.

29. Joubert BR, Haberg SE, Nilsen RM, Wang X, Vollset SE, Murphy SK, et al. 450K epigenome-wide scan identifies differential DNA methylation in newborns related to maternal smoking during pregnancy. Environmental health perspectives. 2012;120(10):1425-31.

30. Holland ML, Lowe R, Caton PW, Gemma C, Carbajosa G, Danson AF, et al. Early-life nutrition modulates the epigenetic state of specific rDNA genetic variants in mice. Science. 2016;353(6298):495-8.

31. Brieno-Enriquez MA, Garcia-Lopez J, Cardenas DB, Guibert S, Cleroux E, Ded L, et al. Exposure to endocrine disruptor induces transgenerational epigenetic deregulation of microRNAs in primordial germ cells. PLoS One. 2015;10(4):e0124296.

32. Dai J, Wang Z, Xu W, Zhang M, Zhu Z, Zhao X, et al. Paternal nicotine exposure defines different behavior in subsequent generation via hyper-methylation of mmu-miR-15b. Sci Rep. 2017;7(1):7286.

33. Hawkey AB, White H, Phippen E, Greengrove E, Rezvani AH, Murphy SK, et al. Paternal nicotine exposure in rats produces long-lasting neurobehavioral effects in the offspring. Neurotoxicol Teratol. 2019;74:106808.

34. Pachenari N, Azizi H, Semnaniann S. Adolescent Morphine Exposure in Male Rats Alters the Electrophysiological Properties of Locus Coeruleus Neurons of the Male Offspring. Neuroscience. 2019;410:108-17.

35. Levin ED, Hawkey AB, Hall BJ, Cauley M, Slade S, Yazdani E, et al. Paternal THC exposure in rats causes long-lasting neurobehavioral effects in the offspring. Neurotoxicol Teratol. 2019;74:106806.

36. Venugopal R, Jaiswal AK. Nrf2 and Nrf1 in association with Jun proteins regulate antioxidant response element-mediated expression and coordinated induction of genes encoding detoxifying enzymes. Oncogene. 1998;17(24):3145-56.

37. Ishii T, Itoh K, Takahashi S, Sato H, Yanagawa T, Katoh Y, et al. Transcription factor Nrf2 coordinately regulates a group of oxidative stress-inducible genes in macrophages. J Biol Chem. 2000;275(21):16023-9.

38. Jung YH, Sauria MEG, Lyu X, Cheema MS, Ausio J, Taylor J, et al. Chromatin States in Mouse Sperm Correlate with Embryonic and Adult Regulatory Landscapes. Cell Rep. 2017;18(6):1366-82.

39. Vallaster MP, Kukreja S, Bing XY, Ngolab J, Zhao-Shea R, Gardner PD, et al. Paternal nicotine exposure alters hepatic xenobiotic metabolism in offspring. *Elife*. 2017;6.
40. Zhang W, Yang J, Lv Y, Li S, Qiang M. Paternal benzo[a]pyrene exposure alters the sperm DNA methylation levels of imprinting genes in F0 generation mice and their unexposed F1-2 male offspring. *Chemosphere*. 2019;228:586-94.
41. Viluksela M, Pohjanvirta R. Multigenerational and Transgenerational Effects of Dioxins. *Int J Mol Sci*. 2019;20(12).
42. McCarthy DM, Morgan TJ, Jr., Lowe SE, Williamson MJ, Spencer TJ, Biederman J, et al. Nicotine exposure of male mice produces behavioral impairment in multiple generations of descendants. *PLoS Biol*. 2018;16(10):e2006497.
43. Tsaprouni LG, Yang TP, Bell J, Dick KJ, Kanoni S, Nisbet J, et al. Cigarette smoking reduces DNA methylation levels at multiple genomic loci but the effect is partially reversible upon cessation. *Epigenetics*. 2014;9(10):1382-96.
44. Zeilinger S, Kuhnel B, Klopp N, Baurecht H, Kleinschmidt A, Gieger C, et al. Tobacco smoking leads to extensive genome-wide changes in DNA methylation. *PLoS One*. 2013;8(5):e63812.
45. Busche S, Shao X, Caron M, Kwan T, Allum F, Cheung WA, et al. Population whole-genome bisulfite sequencing across two tissues highlights the environment as the principal source of human methylome variation. *Genome Biol*. 2015;16:290.
46. Portela A, Esteller M. Epigenetic modifications and human disease. *Nat Biotechnol*. 2010;28(10):1057-68.
47. Barrett EG, Wilder JA, March TH, Espindola T, Bice DE. Cigarette smoke-induced airway hyperresponsiveness is not dependent on elevated immunoglobulin and eosinophilic inflammation in a mouse model of allergic airway disease. *Am J Respir Crit Care Med*. 2002;165(10):1410-8.
48. Chiu K, Lau WM, Lau HT, So KF, Chang RC. Micro-dissection of rat brain for RNA or protein extraction from specific brain region. *J Vis Exp*. 2007(7):269.

**TABLE 1** - Sperm characteristics, growth rates and conception data for F0 smoke-exposed and control animals

|                         | M/ml sperm   | Total motility | Days to conception | # conceived w/in 1 week | # conceived w/in 2 weeks | # conceived w/in 3 weeks | # conceived w/in 4 weeks | # never conceived | Pre-smoke weight | Weight after 4 wks treatment | Weight after 8 wks treatment |
|-------------------------|--------------|----------------|--------------------|-------------------------|--------------------------|--------------------------|--------------------------|-------------------|------------------|------------------------------|------------------------------|
| CN                      | 48.4         | 58.7           | 6.5                | 9.0                     | 9.0                      | 10.0                     | 10.0                     | 2.0               | 20.1             | 24.9                         | 27.7                         |
| SN                      | 40.2         | 56.5           | 11.8               | 3.0                     | 3.0                      | 4.0                      | 5.0                      | 6.0               | 21.4             | 21.1                         | 22.7                         |
| CN vs SN p val          | 0.110        | 0.526          | 0.204              | <b>0.039</b>            | <b>0.039</b>             | <b>0.036</b>             | 0.089                    | 0.193             | 0.247            | <b>0.001</b>                 | <b>&lt;0.0001</b>            |
| CWT                     | 55.2         | 55.4           | 5.8                | 6.0                     | 8.0                      | 8.0                      | 8.0                      | 4.0               | 21.6             | 25.8                         | 28.6                         |
| SWT                     | 51.8         | 54.8           | 5.4                | 6.0                     | 6.0                      | 7.0                      | 7.0                      | 5.0               | 21.0             | 21.1                         | 22.4                         |
| CWT vs SWT p val        | 0.618        | 0.868          | 0.908              | 1.000                   | 0.608                    | 1.000                    | 1.000                    | 1.000             | <b>0.029</b>     | <b>&lt;0.0001</b>            | <b>&lt;0.0001</b>            |
| NRF                     | 44.5         | 57.6           | 8.3                | 12.0                    | 12.0                     | 14.0                     | 15.0                     | 8.0               | 20.9             | 23.0                         | 25.2                         |
| WT                      | 53.5         | 55.1           | 5.6                | 12.0                    | 14.0                     | 15.0                     | 15.0                     | 9.0               | 21.3             | 23.2                         | 25.2                         |
| NRF vs WT p val         | <b>0.039</b> | 0.306          | 0.261              | 1.000                   | 0.773                    | 1.000                    | 1.000                    | 1.000             | 0.444            | 0.757                        | 0.975                        |
| Smoke                   | 46.2         | 55.6           | 8.1                | 9.0                     | 9.0                      | 11.0                     | 12.0                     | 11.0              | 21.0             | 21.1                         | 22.5                         |
| No Smoke                | 51.8         | 57.0           | 6.2                | 15.0                    | 17.0                     | 18.0                     | 18.0                     | 6.0               | 21.4             | 25.6                         | 28.4                         |
| Smoke vs No Smoke p val | 0.207        | 0.556          | 0.432              | 0.148                   | <b>0.042</b>             | 0.075                    | 0.135                    | 0.135             | 0.221            | <b>&lt;0.0001</b>            | <b>&lt;0.0001</b>            |

Abbreviations: CN-control *Nrf<sup>-/-</sup>*, SN-smoke-exposed *Nrf<sup>-/-</sup>*, CWT-control wild type animals, SWT-smoke-exposed wild type animals.

**TABLE 2** – Sperm characteristics, litter size and growth rates for F1 offspring of smoke-exposed and control animals

|                         | Litter size | M/ml sperm | Total sperm motility | Postnatal weight (g) week 4 | Postnatal weight (g) week 6 | Postnatal weight (g) week 10 |
|-------------------------|-------------|------------|----------------------|-----------------------------|-----------------------------|------------------------------|
| CN                      | 5.3         | 25.7       | 36.1                 | 11.6                        | 16.4                        | 17.4                         |
| SN                      | 6.0         | 26.5       | 33.0                 | 12.3                        | 16.6                        | 18.7                         |
| CN vs SN p val          | 0.379       | 0.851      | 0.409                | 0.351                       | 0.727                       | 0.100                        |
| CWT                     | 5.0         | 31.3       | 27.3                 | 12.1                        | 16.2                        | 17.4                         |
| SWT                     | 5.2         | 33.6       | 34.0                 | 12.7                        | 16.8                        | 17.8                         |
| CWT vs SWT p val        | 0.723       | 0.708      | 0.207                | 0.254                       | 0.260                       | 0.354                        |
| NRF                     | 5.5         | 26.0       | 34.0                 | 11.8                        | 16.4                        | 17.6                         |
| WT                      | 5.1         | 32.5       | 30.5                 | 12.5                        | 16.4                        | 17.5                         |
| NRF vs WT p val         | 0.356       | 0.063      | 0.264                | 0.194                       | 0.979                       | 0.828                        |
| Smoke                   | 5.6         | 29.8       | 32.0                 | 12.5                        | 16.7                        | 18.0                         |
| No Smoke                | 5.2         | 27.3       | 33.2                 | 11.7                        | 16.3                        | 17.4                         |
| Smoke vs No Smoke p val | 0.424       | 0.469      | 0.700                | 0.104                       | 0.288                       | 0.105                        |

Sperm characteristics, litter size and growth rates for F1 offspring of smoke-exposed and control animals. Abbreviations: CN-control *Nrf*<sup>-/-</sup>, SN-smoke-exposed *Nrf*<sup>-/-</sup>, CWT-control wild type animals, SWT-smoke-exposed wild type animals.

**Figure 1 Schematic of study design.** Six to seven-week-old WT and *Nrf2*<sup>-/-</sup> mice were assigned to one of two groups: CS-exposed and non-exposed controls. Following 60 days of CS exposure, mice were bred to unexposed CAST/EiJ female mice. Groups of animals were euthanized and tissues collected 3, 28, 103, and 171 days after removal from CS exposure. Sperm DNA methylation analysis was performed by RRBS on F0 exposed and control animals. Offspring derived from exposed and control C57BL/6J males were euthanized at 14-17 weeks of age, and tissues were collected. DNA methylation analysis was performed on sperm and frontal cortex to investigate the impact of paternal smoking status on methylation patterns in offspring. In addition, RNAseq was performed on frontal cortex tissue to investigate the association between paternal smoking and neural gene expression.

**Figure 2 Summary of the recovery, persistence or emergence of differentially methylated loci (A and B) and regions (C and D) following a recovery period.** A) Quantitative data indicate that the number of differentially methylated loci in CS-exposed mice compared with age matched controls does not diminish following a recovery period of up to 171 days. B) When considering only loci that lost methylation in the CS-exposed group, about one third of differentially methylated loci persisted for the entire recovery period (white), one third returned to baseline levels (blue) and one third emerged as differentially methylated following a recovery period (pink). Contrastingly, for loci that gained methylation as a result of CS exposure, a smaller fraction of differentially

736 methylated CpGs persisted of recovered while nearly half of differentially  
 737 methylated loci emerged during the recovery period. C) Unlike the case of  
 738 recovery at the CpG level, when differentially methylated regions were analyzed,  
 739 a significant proportion (about half) of regions recovered within 28 days without  
 740 CS exposure, with no evidence for additional recovery following longer periods of  
 741 recovery. D) The majority of DMRs observed prior to recovery were either  
 742 maintained across the recovery period or returned to baseline levels, with only a  
 743 small fraction of DMRs emerging during the recovery period. Of note, regions  
 744 that gained methylation in CS-exposed animals were less likely to recover and  
 745 more likely to emerge as a new DMR during the recovery period compared with  
 746 DMRs that lost methylation. Timepoint 1 = 28-day recovery group, timepoint 2 =  
 747 103-day recovery group, and timepoint 3 = 171-day recovery group. All  
 748 comparisons were to the 3-day recovery group.

749  
 750 **Figure 3 DMR recovery and comparison of DMRs in WT mice with CS-**  
 751 **exposed and control *Nrf2*<sup>-/-</sup> mice as well as previously published sperm**  
 752 **DMRs.** A) Impact of the initial methylation status and direction of change on  
 753 methylation recovery. The hypomethylated DMRs (<25% DNAm) in which  
 754 methylation increased and the hypermethylated DMRs (> 75% DNAm) in which  
 755 methylation decreased with smoke exposure were more likely to recover.  
 756 Regions displaying methylation between 25% and 75% Regions of intermediate  
 757 DNAm were less likely to recover across all groups. Timepoint 1 = 28-day  
 758 recovery group, timepoint 2 = 103-day recovery group, and timepoint 3 = 171-day

recovery group. All comparisons were to the 3-day recovery group. B) Heatmap illustrating the significant similarity between CS-associated DMRs identified in WT mice and DMRs associated with the *Nrf2*<sup>-/-</sup> genotype, apparently independent of CS-exposure status. C) A high correlation in DMRs was observed between CS-exposed WT mice and *Nrf2*<sup>-/-</sup> whether or not they were exposed to CS. No correlation was observed between DMRs identified in the current study compared with previously published DMRs associated with vinclozolin exposure (VD2) and protein restricted diet (PR).

**Figure 4 Impact of paternal CS-exposure and genotype on F1 brain and sperm DNAm.** A) A highly significant correlation was observed in F1 brain DNAm changes induced by CS exposure in WT sires (x-axis) compared with DNAm changes associated *Nrf2* status irrespective of CS exposure (left 2 panels), however the correlation disappeared when evaluating differential methylation in *Nrf2*<sup>-/-</sup> offspring based on CS exposure status compared with CS-associated DNAm changes in offspring sired by WT mice. B) The DNAm changes observed in F0 sperm were not observed in the sperm of F1 offspring, suggesting the CS-associated effects likely do not confer risk transgenerationally. C) Likewise, no significant overlap was observed in differentially methylated regions in F0 sperm compared with differentially methylated regions in F1 frontal cortex.



**Figure 5 Frontal cortex gene expression variation and correlation between WT and *Nrf2*<sup>-/-</sup> offspring in relation to smoking status.** A) Variation in F1 frontal cortex gene expression was significantly higher in WT CS-exposed animals compared with WT controls (left panel) suggesting stochastic dysregulation of gene expression in paternal CS-exposed offspring and offspring of mice with reduced antioxidant capacity. Likewise, variation was significantly higher in *Nrf2*<sup>-/-</sup> controls compared with WT controls (right panel). B) A significant correlation was observed between differentially expressed genes associated with *Nrf2*<sup>-/-</sup> genotype, with (left panel) or without CS exposure (center panel) and CS-exposure-induced differential gene expression. There is no association gene expression impacted by smoking status in *Nrf2*<sup>-/-</sup> offspring (right panel). C) Gene ontology analysis of significantly upregulated and D) downregulated genes associated with paternal CS exposure indicated overrepresentation of several gene families.

**Figure S1 Scatter plots of CpG-level and regional sperm DNAm in CS-exposed vs control WT mice across the recovery timeline.** A) DNAm at all CpGs across the genome B) Regional DNAm comparisons. Broad genome-wide changes in DNAm, either at individual CpGs or within genomic regions, are not observed. Further, the methylation at individual CpGs deviates much more broadly than regional DNAm, supporting the role of increased CpG density in buffering environmentally-induced DNAm. Smoked WT = samples collected 3

days after removal from CS, recovery 1 = 28-day recovery group, recovery 2 = 103-day recovery group, and recovery 3 = 171-day recovery group.

**Figure S2 Scatter plots of regional sperm DNAm for control and smoked NRF versus control and smoked WT.** Like the distributions observed in figure S1, these plots indicate that CS exposure and *Nrf*<sup>-/-</sup> do not induce broad genome-wide changes in sperm DNA methylation.

**Figure S3 DNAm variation in shared, recovered and new DMRs as a function of CpG density across recovery timepoints.** A) In every category of DMR (shared, recovery or new) variation diminished as CpG density of a region increased. The impact of CpG density on variation was particularly apparent for regions in which DNAm decreased as a result of CS exposure and later recovered to baseline. B) DMRs that displayed increased DNAm in CS-exposed animals and later recovered were generally regions of lower CpG density, while DMRs that gained methylation and subsequently recovered were generally at regions of higher CpG density. Timepoint 1 = 28-day recovery group, timepoint 2 = 103-day recovery group, and timepoint 3 = 171-day recovery group. All comparisons were to the 3-day recovery group.

**Figure S4 Chromatin properties at F0 sperm DMRs and variation in F1 frontal cortex gene expression.** A) Chromatin accessibility was not predictive of the propensity of DMRs to recover or be maintained after removal of CS

exposure. B and C) Localization of H3K4me3 and H3K27me3 was likewise not associated with DMR recovery or maintenance. D) Scatter plot of F1 frontal cortex variation in gene expression in CS-exposed versus control *Nrf<sup>-/-</sup>* mice, demonstrating that paternal CS exposure did not further elevate the increased gene expression variation in *Nrf<sup>-/-</sup>* offspring beyond the effects of genotype alone illustrated in Figure 5A. E) Scatter plot of F1 frontal cortex gene expression variation in CS-exposed WT offspring versus control *Nrf<sup>-/-</sup>* demonstrating that control *Nrf<sup>-/-</sup>* offspring exhibit a similar degree of variation as CS-exposed WT animals.

**LIST OF ABBREVIATIONS:** DMR-differentially methylated regions; DNAm-DNA methylation; CS-cigarette smoke; CN-control *Nrf2*<sup>-/-</sup> ; SN-smoke-exposed *Nrf2*<sup>-/-</sup> , CWT-control wild type animals; SWT-smoke-exposed wild type; VD2-vinclozolin exposure; PR-protein restricted diet; ESTR-expanded simple tandem repeat; NRF2- nuclear factor (erythroid-derived 2)-like 2; GO-gene ontology

**Ethics approval and consent to participate:** All animal experiments were performed under protocols that were approved by the University of Utah Institutional Animal Care and Use Committee (protocol # 14-11006).

**Consent for publication:** Not applicable

**Availability of data and material:** The datasets used and/or analyzed during the current study have been deposited in NCBI's Gene Expression Omnibus are publicly available GEO Submission (GSE133742) [NCBI tracking system and are accessible through GEO Series accession number GSE133742 (<https://www.ncbi.nlm.nih.gov/geo/query/acc.cgi?acc=GSE133742>). Sperm DNA methylation datasets used for comparison to data generated in the current study are likewise available through GEO: GSE7261 and GSE65784.

**Competing interests:** The authors declare that they have no competing interests.

**Funding:** This work was supported by a grant from the Eunice Kennedy Shriver National Institute of Child Health and Human Development, USA (R01HD082062).

**Authors' contributions:** PJM directed RRBS experiments, analyzed RRBS and RNAseq datasets and assisted in manuscript preparation. JG analyzed RRBS and RNAseq datasets, prepared figures and assisted in manuscript preparation. TGJ assisted in study design and animal experiments as well as data analysis and interpretation. JRH assisted with initial study design, and data interpretation, TH assisted with animal experiments including CS treatments and animal phenotyping. JMH assisted with study design and manuscript preparation. DTC assisted with initial study design, data interpretation and manuscript preparation. BRC assisted with study design, data analysis and interpretation and manuscript preparation. KIA assisted in study design, animal experiments, molecular experiments and data analysis and took the primary role in manuscript preparation. All authors read and approved the final manuscript.

**Acknowledgements:** Not applicable

# Figure 1

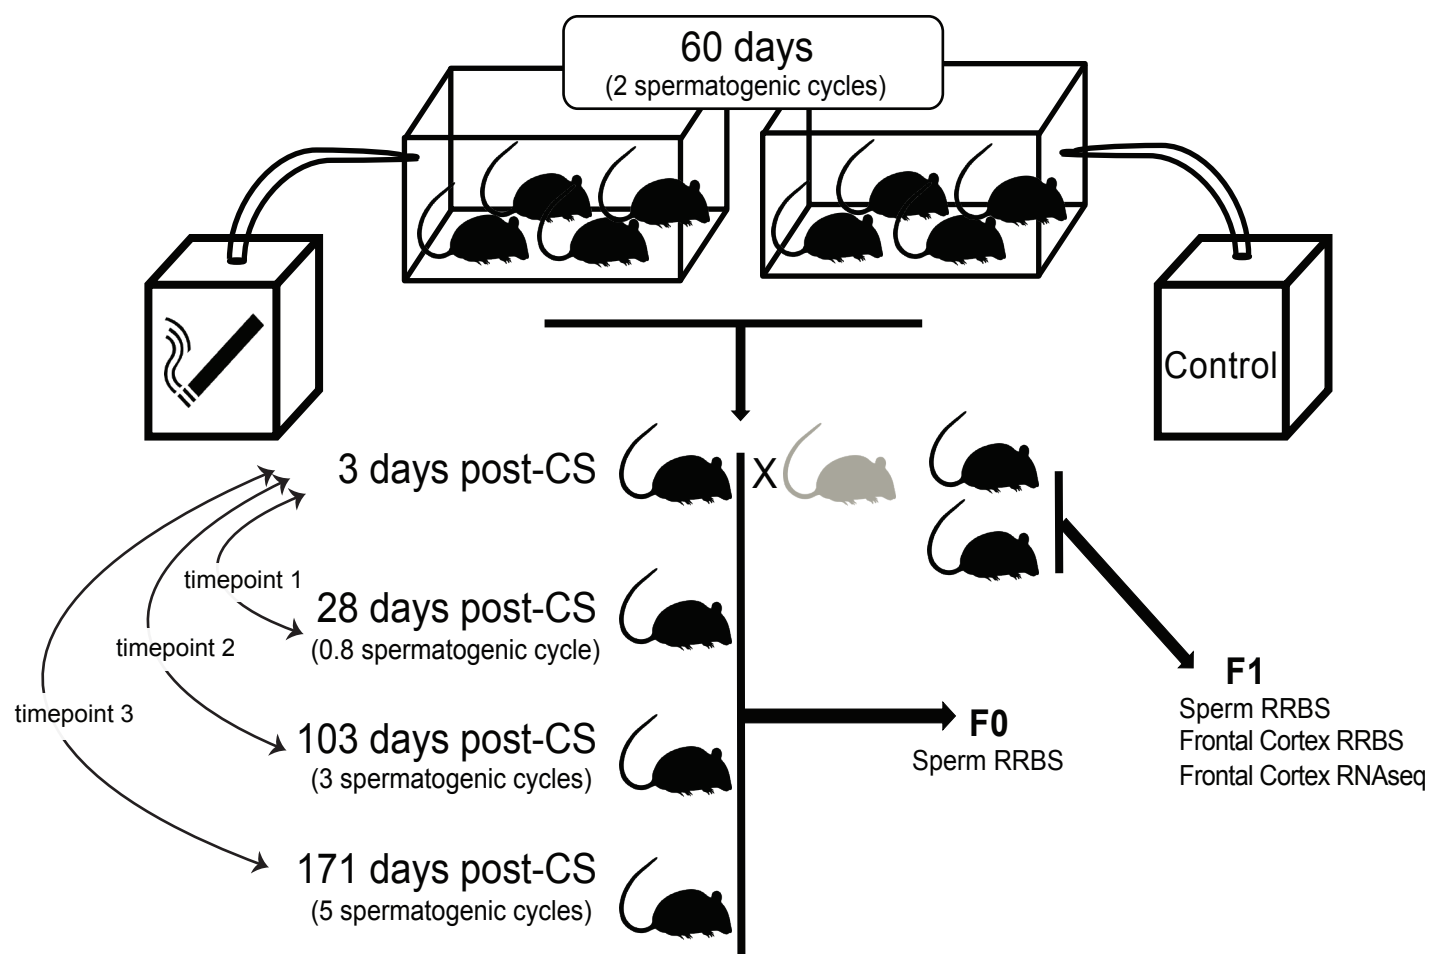

# Figure 2

**A**

## Distribution of CpGs post-CS

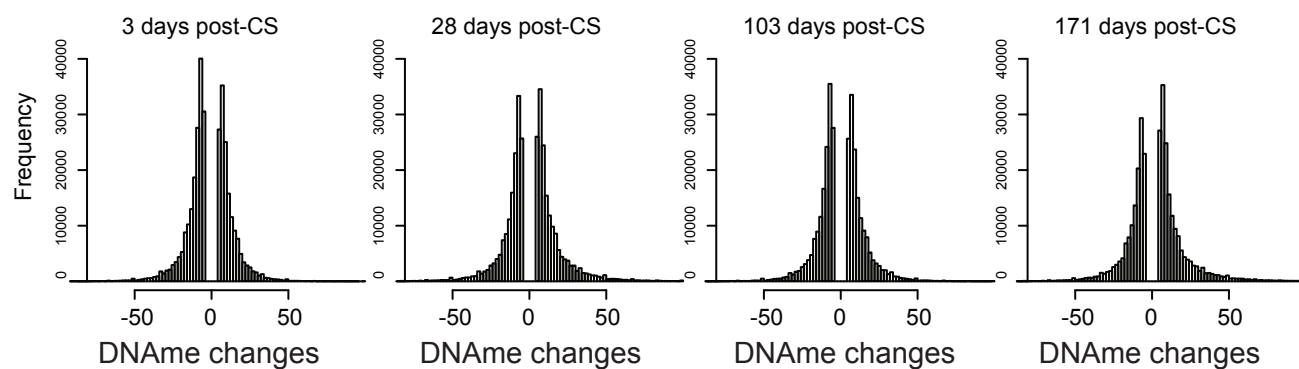

**B**

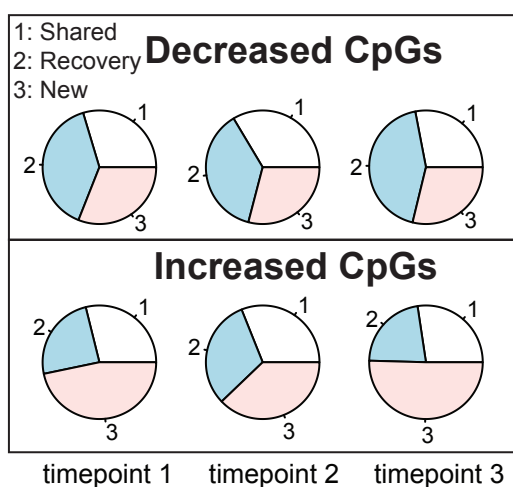

**D**

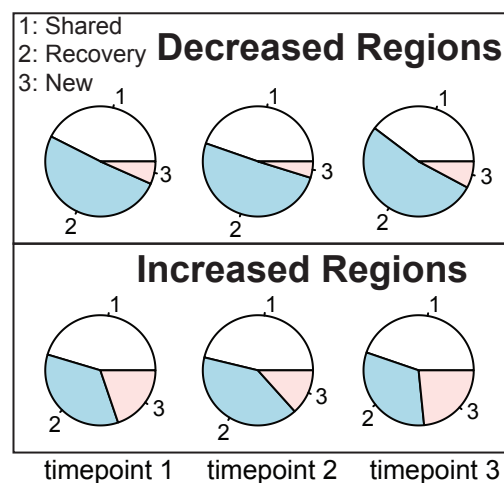

**C**

## Distribution of regions post-CS

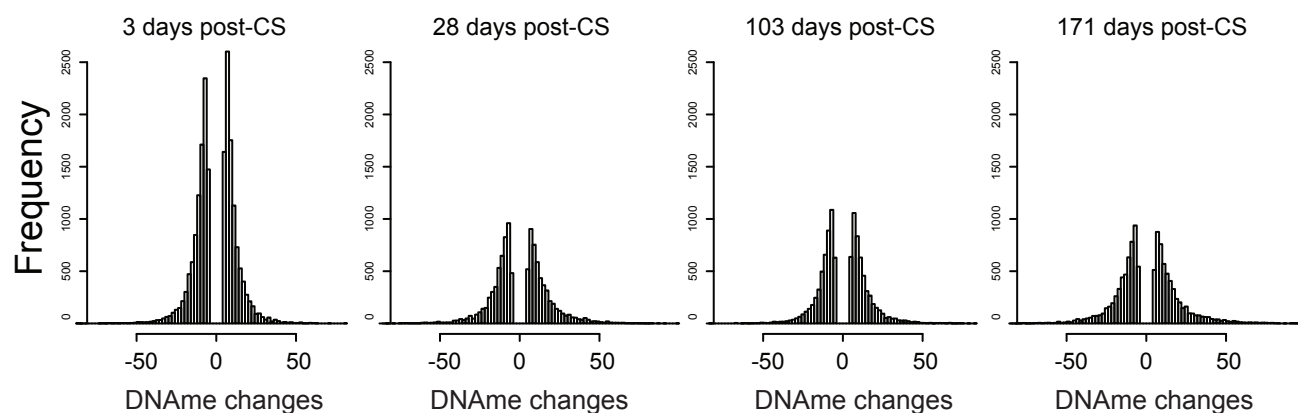

# Figure 3

**A**

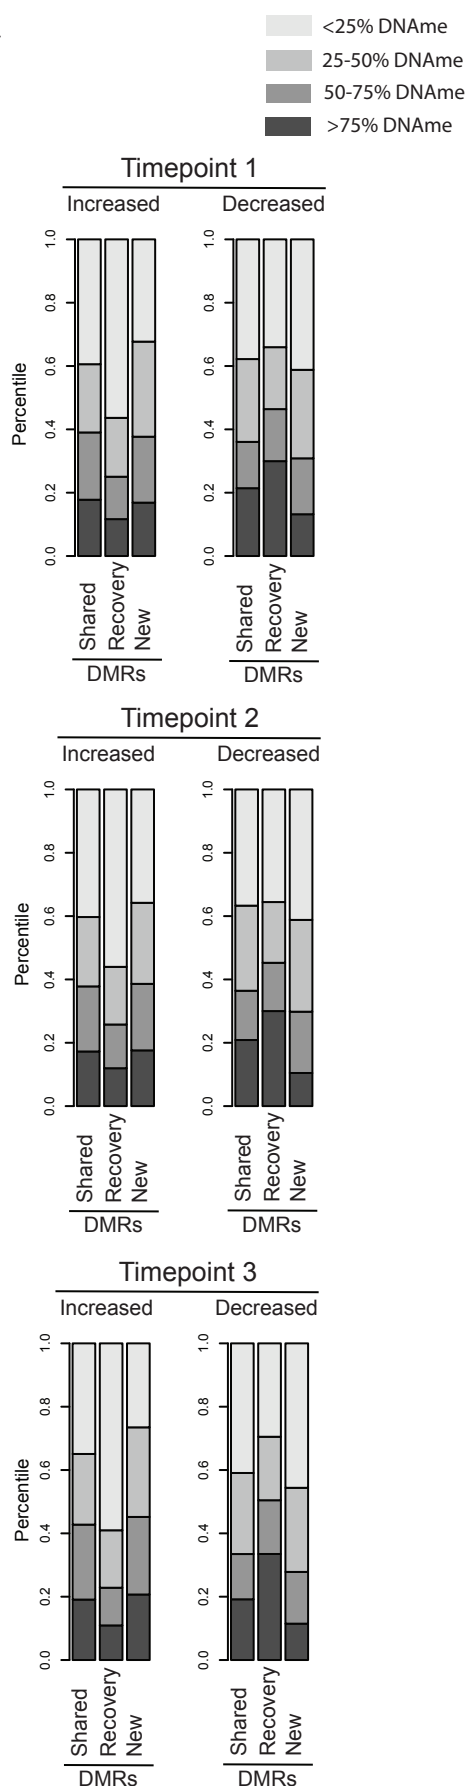

**B**

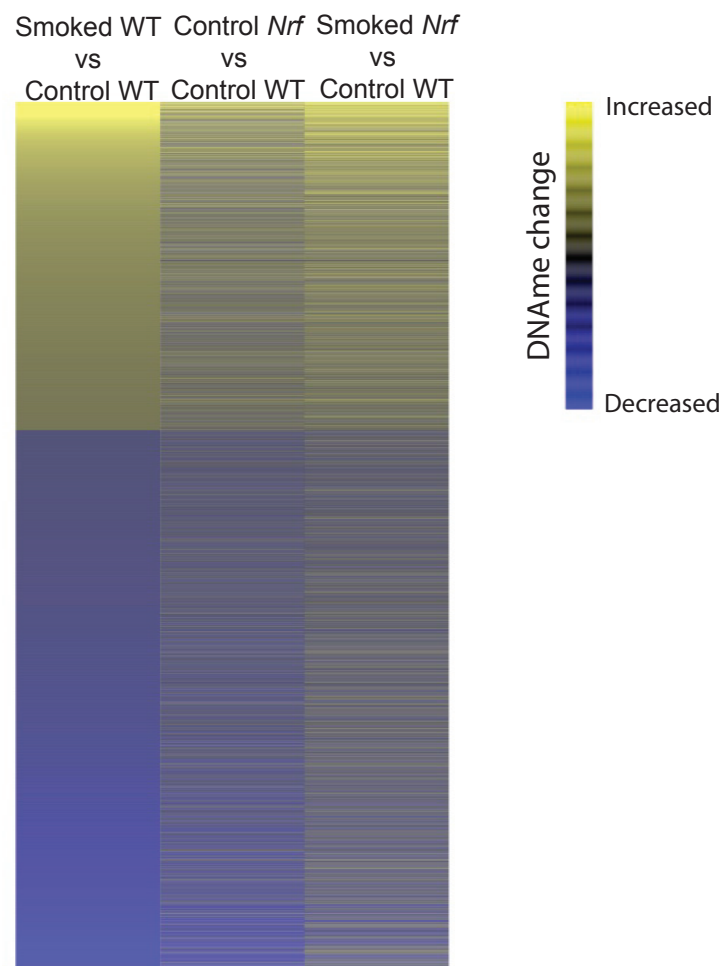

**C**

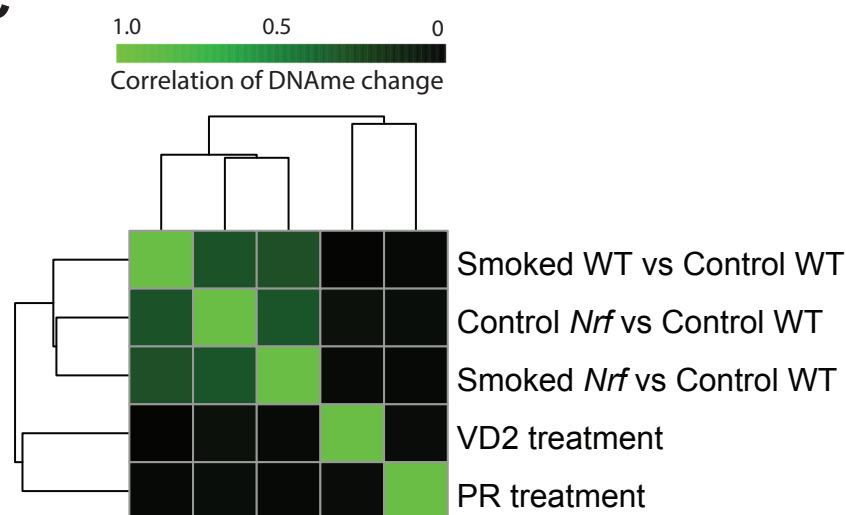



Figure 4

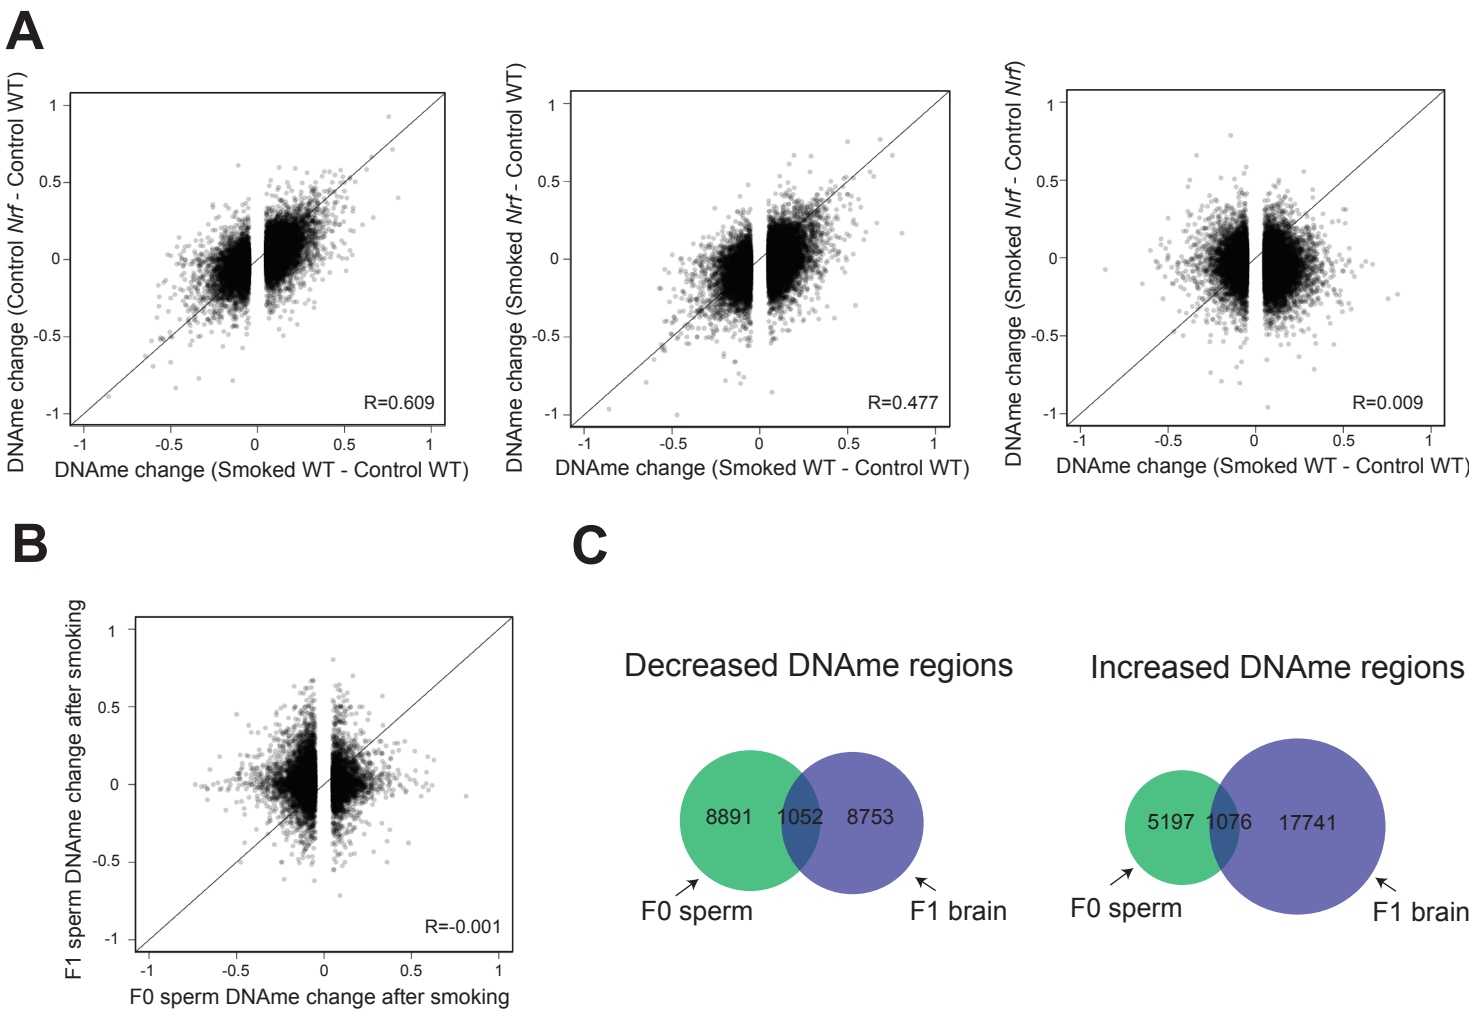

## Figure 5

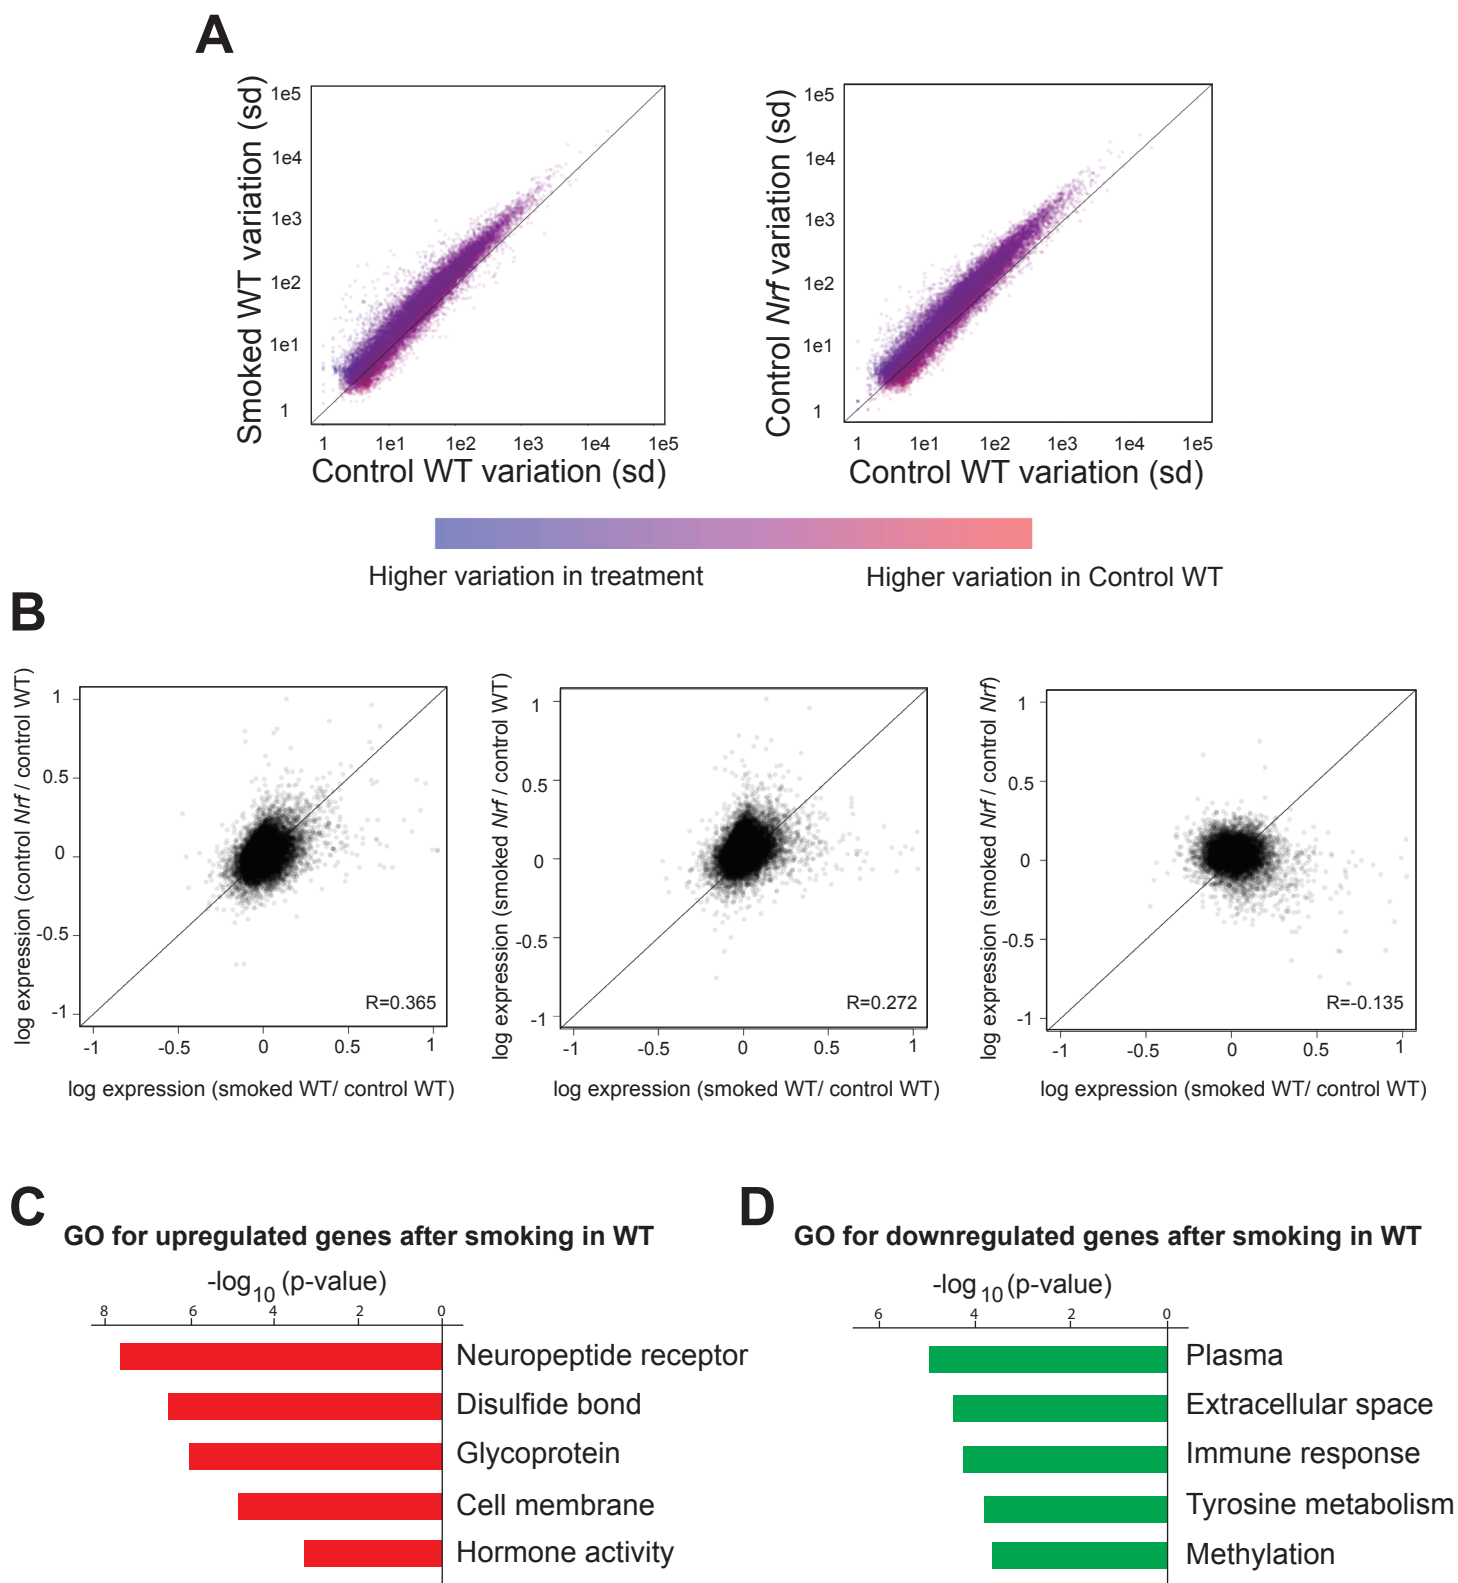

# Figure S1

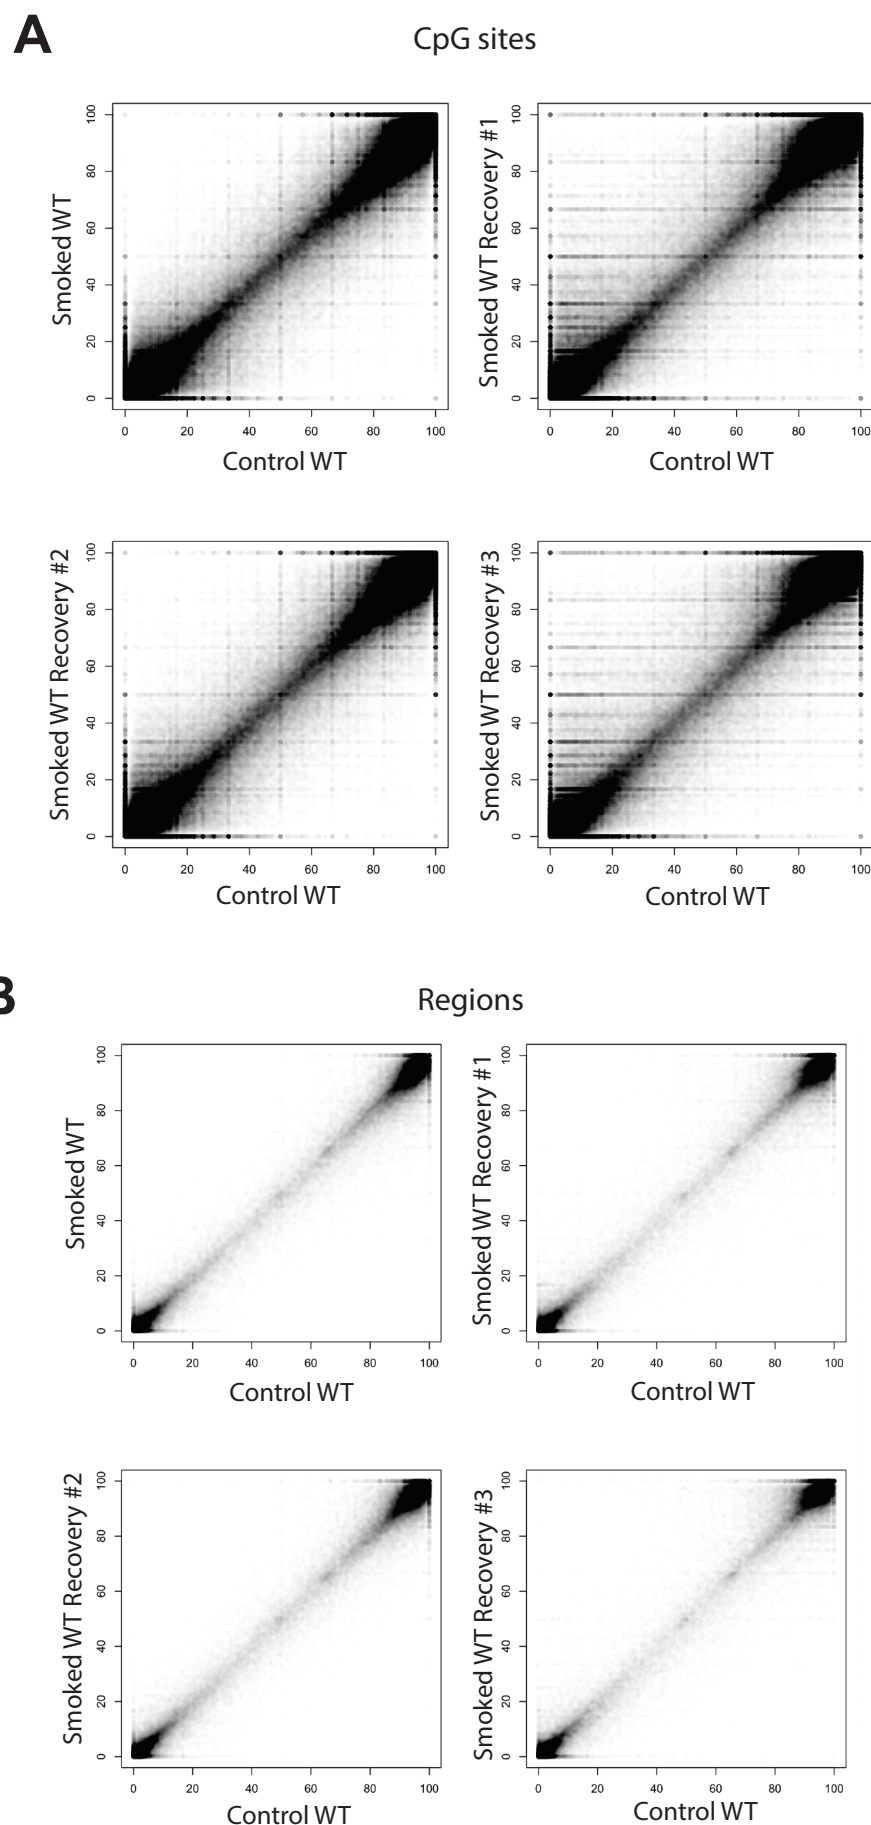

# Figure S2

**A**

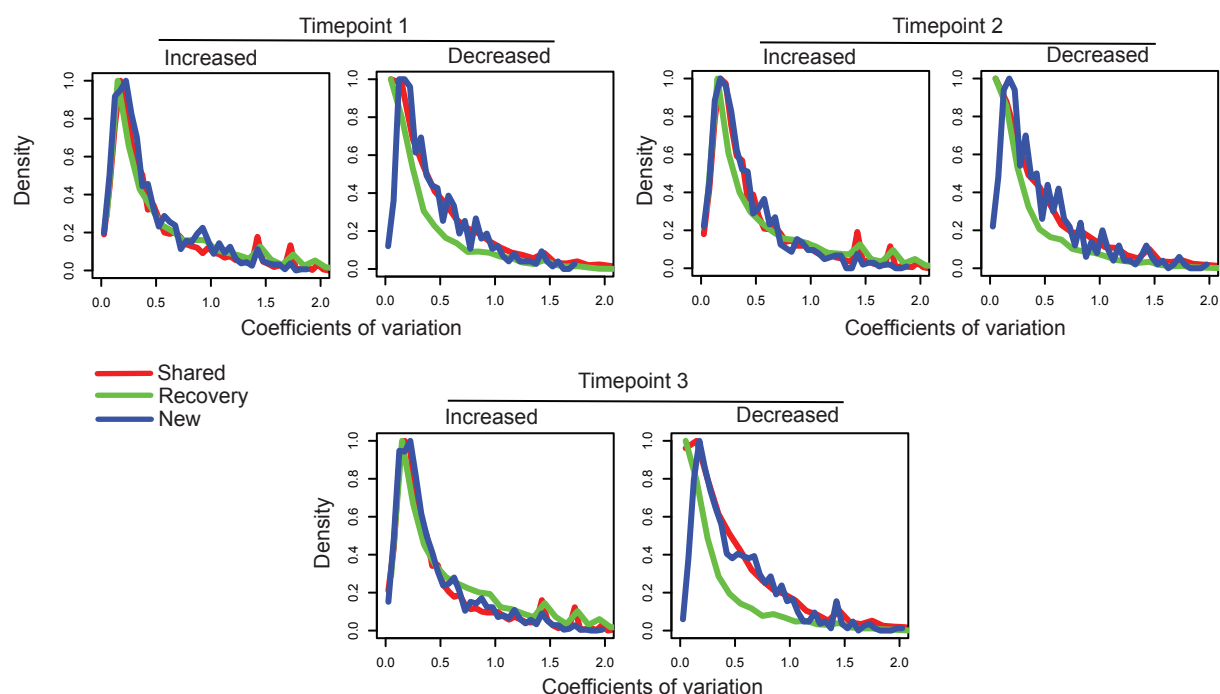

**B**

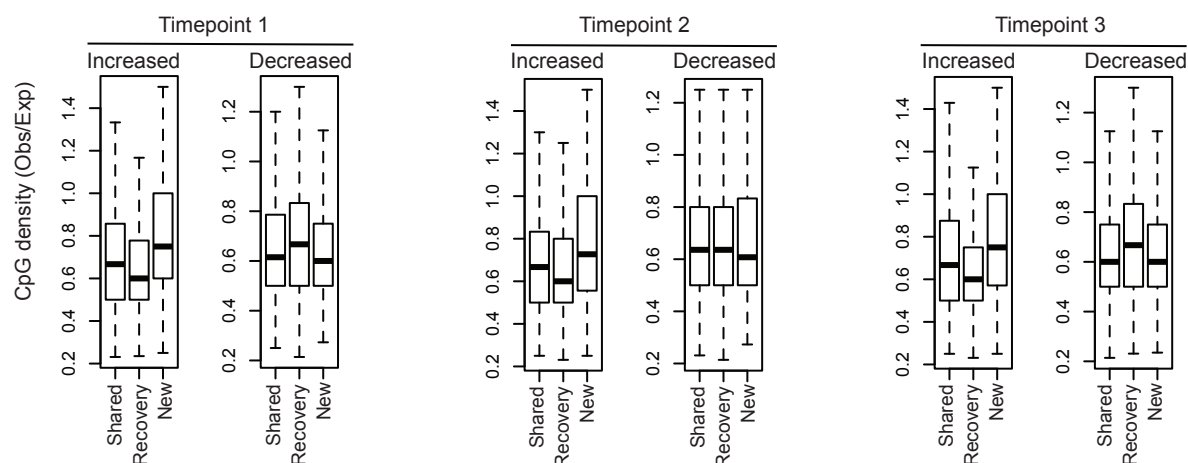

# Figure S3

A

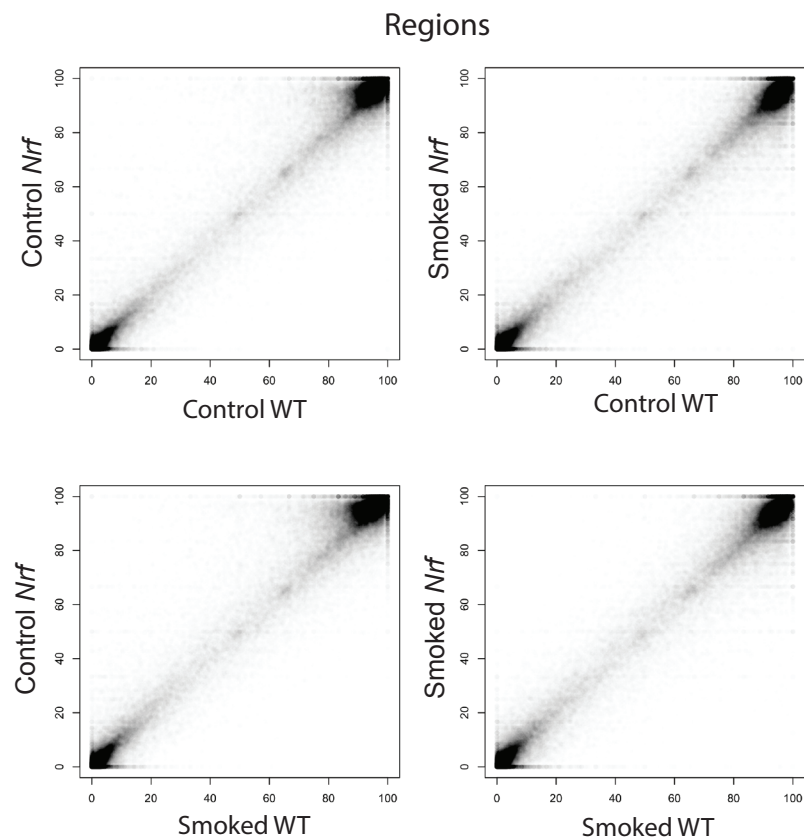

## Figure S4

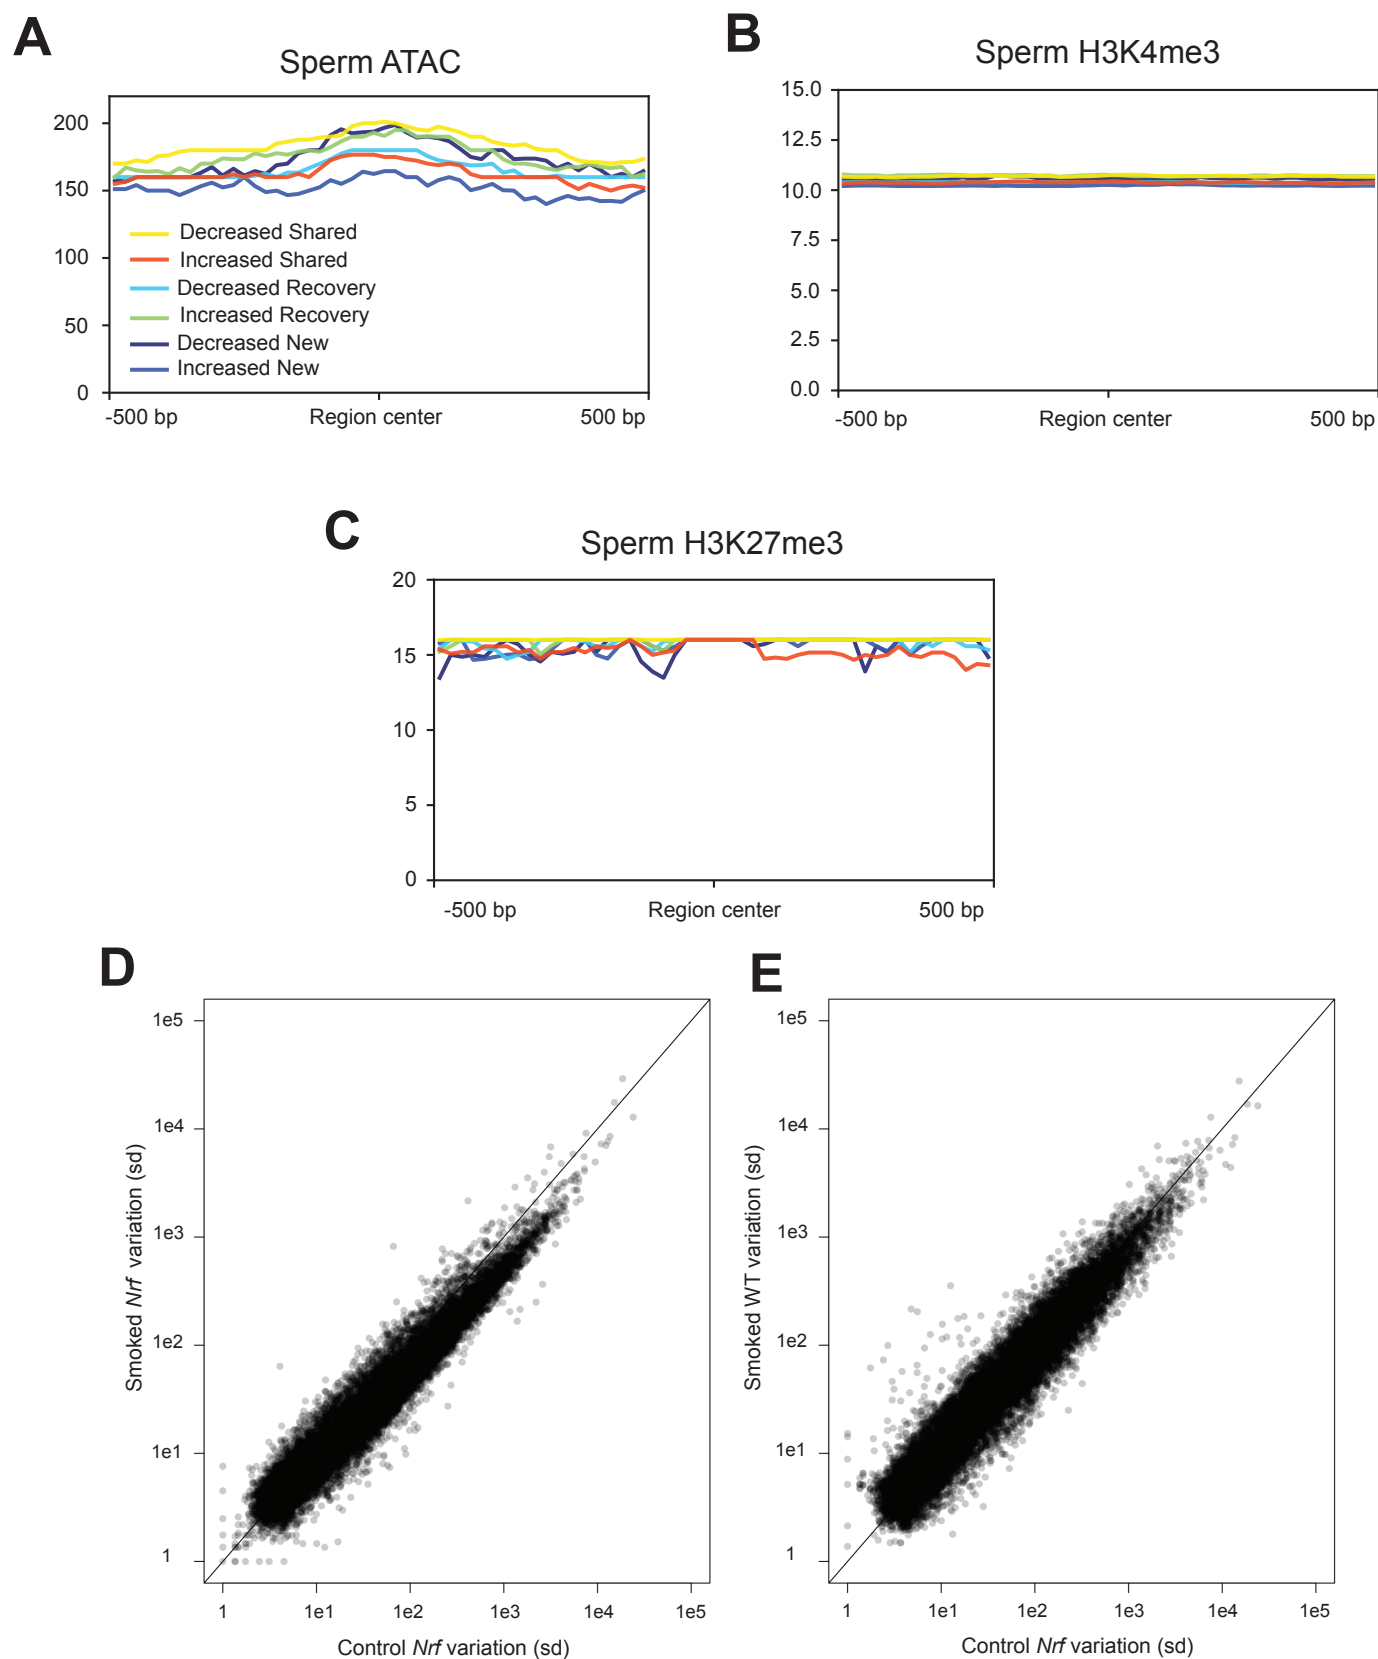

Source: https://www.biorxiv.org/content/10.1101/750638v1.full.pdf
